# Supplementary material for: Effect of screening for type 2 diabetes on risk of cardiovascular disease and mortality: a controlled trial among 139,075 individuals diagnosed with diabetes in Denmark between 2001 and 2009
Source: Springer Nature journal article supplement (doi:10.1007/s00125-017-4299-y), 2017-08-19
Supplement: MOESM1 [file 14232616]

## Electronic supplementary material

**Table 1** Cause-specific mortality groupings by ICD-10 code

| <b>Cause-specific mortality</b>   | <b>ICD-10 code used</b>                                                                       |
|-----------------------------------|-----------------------------------------------------------------------------------------------|
| Cardiovascular                    | F01*, I*                                                                                      |
| Cancer                            | C*, D0* to D4*,                                                                               |
| Suicide / violence / accident     | F1*, V*, W*, X*, Y*                                                                           |
| Other                             | A*, B*, D5* to D8*, E*, F00*, F02* to F09*,<br>F2* to F9*, G*, H*, J*, K*, L*, M*, N*, P*, Q* |
| Unknown                           | R*                                                                                            |
| <b>Diabetes-related mortality</b> | E10* to E14*                                                                                  |
